# Supplementary material for: Net-Zero Target and Emissions from Land Conversions: A Case Study of Maryland’s Climate Solutions Now Act
Source: MDPI journal article supplement (doi:10.3390/geographies3010003), 2022-12-29
Supplement: s1 [file s1]

**Table S3.** Midpoint total soil carbon (TSC) storage and its monetary value by soil order and county for the state of Maryland (USA), based on the areas shown in Table 3 and the area-normalized midpoint monetary values in Table 4.

| County/City     | Total<br>TSC Storage<br>(kg),<br>SC-CO <sub>2</sub><br>(\$ = USD) | Degree of Weathering and Soil Development                     |                                                               |                                                               |                                                               |                                                              |                                                                |
|-----------------|-------------------------------------------------------------------|---------------------------------------------------------------|---------------------------------------------------------------|---------------------------------------------------------------|---------------------------------------------------------------|--------------------------------------------------------------|----------------------------------------------------------------|
|                 |                                                                   | Slight                                                        |                                                               |                                                               | Moderate                                                      | Strong                                                       |                                                                |
|                 |                                                                   | Entisols                                                      | Inceptisols                                                   | Histosols                                                     | Alfisols                                                      | Spodosols                                                    | Ultisols                                                       |
|                 |                                                                   | Total TSC Storage (kg),<br>SC-CO <sub>2</sub> (\$ = USD)      |                                                               |                                                               |                                                               |                                                              |                                                                |
| Allegany        | 1.2 × 10 <sup>10</sup><br>\$2.0 × 10 <sup>9</sup>                 | 6.6 × 10 <sup>8</sup><br>\$1.1 × 10 <sup>8</sup>              | 7.7 × 10 <sup>9</sup><br>\$1.3 × 10 <sup>9</sup>              | 0<br>\$0                                                      | 1.1 × 10 <sup>9</sup><br>\$1.9 × 10 <sup>8</sup>              | 1.6 × 10 <sup>4</sup><br>\$2.8 × 10 <sup>3</sup>             | 2.3 × 10 <sup>9</sup><br>\$4.0 × 10 <sup>8</sup>               |
| Anne Arundel    | 8.3 × 10 <sup>9</sup><br>\$1.4 × 10 <sup>9</sup>                  | 5.1 × 10 <sup>8</sup><br>\$8.6 × 10 <sup>7</sup>              | 1.3 × 10 <sup>9</sup><br>\$2.2 × 10 <sup>8</sup>              | 9.8 × 10 <sup>8</sup><br>\$1.6 × 10 <sup>8</sup>              | 4.7 × 10 <sup>8</sup><br>\$8.0 × 10 <sup>7</sup>              | 0<br>\$0                                                     | 5.0 × 10 <sup>9</sup><br>\$8.5 × 10 <sup>8</sup>               |
| Baltimore City  | 1.1 × 10 <sup>9</sup><br>\$1.9 × 10 <sup>8</sup>                  | 3.3 × 10 <sup>8</sup><br>\$5.6 × 10 <sup>7</sup>              | 9.7 × 10 <sup>7</sup><br>\$1.6 × 10 <sup>7</sup>              | 1.2 × 10 <sup>5</sup><br>\$2.1 × 10 <sup>4</sup>              | 3.5 × 10 <sup>8</sup><br>\$5.8 × 10 <sup>7</sup>              | 0<br>\$0                                                     | 3.5 × 10 <sup>8</sup><br>\$6.0 × 10 <sup>7</sup>               |
| Baltimore       | 1.3 × 10 <sup>10</sup><br>\$2.2 × 10 <sup>9</sup>                 | 2.3 × 10 <sup>9</sup><br>\$4.0 × 10 <sup>8</sup>              | 2.3 × 10 <sup>9</sup><br>\$4.0 × 10 <sup>8</sup>              | 9.9 × 10 <sup>8</sup><br>\$1.7 × 10 <sup>8</sup>              | 1.6 × 10 <sup>9</sup><br>\$2.7 × 10 <sup>8</sup>              | 0<br>\$0                                                     | 5.8 × 10 <sup>9</sup><br>\$9.8 × 10 <sup>8</sup>               |
| Calvert         | 7.3 × 10 <sup>9</sup><br>\$1.2 × 10 <sup>9</sup>                  | 5.5 × 10 <sup>8</sup><br>\$9.3 × 10 <sup>7</sup>              | 3.3 × 10 <sup>9</sup><br>\$5.6 × 10 <sup>8</sup>              | 1.6 × 10 <sup>9</sup><br>\$2.7 × 10 <sup>8</sup>              | 6.4 × 10 <sup>7</sup><br>\$1.1 × 10 <sup>7</sup>              | 0<br>\$0                                                     | 1.8 × 10 <sup>9</sup><br>\$3.0 × 10 <sup>8</sup>               |
| Caroline        | 5.4 × 10 <sup>9</sup><br>\$9.1 × 10 <sup>8</sup>                  | 6.5 × 10 <sup>8</sup><br>\$1.1 × 10 <sup>8</sup>              | 2.9 × 10 <sup>8</sup><br>\$4.9 × 10 <sup>7</sup>              | 4.6 × 10 <sup>8</sup><br>\$7.7 × 10 <sup>7</sup>              | 3.7 × 10 <sup>7</sup><br>\$6.2 × 10 <sup>6</sup>              | 0<br>\$0                                                     | 3.9 × 10 <sup>9</sup><br>\$6.7 × 10 <sup>8</sup>               |
| Carroll         | 9.7 × 10 <sup>9</sup><br>\$1.6 × 10 <sup>9</sup>                  | 4.2 × 10 <sup>8</sup><br>\$7.2 × 10 <sup>7</sup>              | 1.6 × 10 <sup>9</sup><br>\$2.7 × 10 <sup>8</sup>              | 0<br>\$0                                                      | 2.0 × 10 <sup>9</sup><br>\$3.4 × 10 <sup>8</sup>              | 0<br>\$0                                                     | 5.6 × 10 <sup>9</sup><br>\$9.5 × 10 <sup>8</sup>               |
| Cecil           | 5.8 × 10 <sup>9</sup><br>\$9.7 × 10 <sup>8</sup>                  | 5.9 × 10 <sup>8</sup><br>\$1.0 × 10 <sup>8</sup>              | 4.0 × 10 <sup>8</sup><br>\$6.7 × 10 <sup>7</sup>              | 0<br>\$0                                                      | 5.9 × 10 <sup>8</sup><br>\$9.9 × 10 <sup>7</sup>              | 0<br>\$0                                                     | 4.2 × 10 <sup>9</sup><br>\$7.1 × 10 <sup>8</sup>               |
| Charles         | 9.9 × 10 <sup>9</sup><br>\$1.7 × 10 <sup>9</sup>                  | 1.1 × 10 <sup>9</sup><br>\$1.9 × 10 <sup>8</sup>              | 1.7 × 10 <sup>9</sup><br>\$2.9 × 10 <sup>8</sup>              | 0<br>\$0                                                      | 4.6 × 10 <sup>8</sup><br>\$7.7 × 10 <sup>7</sup>              | 0<br>\$0                                                     | 6.6 × 10 <sup>9</sup><br>\$1.1 × 10 <sup>9</sup>               |
| Dorchester      | 3.0 × 10 <sup>10</sup><br>\$5.0 × 10 <sup>9</sup>                 | 1.5 × 10 <sup>9</sup><br>\$2.6 × 10 <sup>8</sup>              | 7.3 × 10 <sup>8</sup><br>\$1.2 × 10 <sup>8</sup>              | 1.9 × 10 <sup>10</sup><br>\$3.2 × 10 <sup>9</sup>             | 2.7 × 10 <sup>9</sup><br>\$4.6 × 10 <sup>8</sup>              | 0<br>\$0                                                     | 5.9 × 10 <sup>9</sup><br>\$1.0 × 10 <sup>9</sup>               |
| Frederick       | 1.7 × 10 <sup>10</sup><br>\$2.9 × 10 <sup>9</sup>                 | 2.1 × 10 <sup>8</sup><br>\$3.5 × 10 <sup>7</sup>              | 3.8 × 10 <sup>9</sup><br>\$6.4 × 10 <sup>8</sup>              | 0<br>\$0                                                      | 9.8 × 10 <sup>9</sup><br>\$1.7 × 10 <sup>9</sup>              | 5.1 × 10 <sup>7</sup><br>\$8.5 × 10 <sup>6</sup>             | 3.5 × 10 <sup>9</sup><br>\$5.9 × 10 <sup>8</sup>               |
| Garrett         | 1.7 × 10 <sup>10</sup><br>\$2.8 × 10 <sup>9</sup>                 | 4.7 × 10 <sup>8</sup><br>\$8.1 × 10 <sup>7</sup>              | 7.7 × 10 <sup>9</sup><br>\$1.3 × 10 <sup>9</sup>              | 0<br>\$0                                                      | 1.1 × 10 <sup>9</sup><br>\$1.9 × 10 <sup>8</sup>              | 6.8 × 10 <sup>8</sup><br>\$1.2 × 10 <sup>8</sup>             | 6.6 × 10 <sup>9</sup><br>\$1.1 × 10 <sup>9</sup>               |
| Harford         | 1.2 × 10 <sup>10</sup><br>\$2.0 × 10 <sup>9</sup>                 | 5.7 × 10 <sup>7</sup><br>\$9.7 × 10 <sup>6</sup>              | 3.8 × 10 <sup>9</sup><br>\$6.4 × 10 <sup>8</sup>              | 3.0 × 10 <sup>9</sup><br>\$5.0 × 10 <sup>8</sup>              | 1.6 × 10 <sup>9</sup><br>\$2.6 × 10 <sup>8</sup>              | 0<br>\$0                                                     | 3.6 × 10 <sup>9</sup><br>\$6.2 × 10 <sup>8</sup>               |
| Howard          | 5.1 × 10 <sup>9</sup><br>\$8.7 × 10 <sup>8</sup>                  | 4.2 × 10 <sup>8</sup><br>\$7.2 × 10 <sup>7</sup>              | 1.7 × 10 <sup>9</sup><br>\$2.9 × 10 <sup>8</sup>              | 0<br>\$0                                                      | 2.0 × 10 <sup>8</sup><br>\$3.3 × 10 <sup>7</sup>              | 0<br>\$0                                                     | 2.8 × 10 <sup>9</sup><br>\$4.7 × 10 <sup>8</sup>               |
| Kent            | 6.0 × 10 <sup>9</sup><br>\$1.0 × 10 <sup>9</sup>                  | 4.6 × 10 <sup>8</sup><br>\$7.8 × 10 <sup>7</sup>              | 2.2 × 10 <sup>6</sup><br>\$3.8 × 10 <sup>5</sup>              | 1.2 × 10 <sup>9</sup><br>\$2.0 × 10 <sup>8</sup>              | 0<br>\$0                                                      | 0<br>\$0                                                     | 4.3 × 10 <sup>9</sup><br>\$7.3 × 10 <sup>8</sup>               |
| Montgomery      | 1.1 × 10 <sup>10</sup><br>\$1.8 × 10 <sup>9</sup>                 | 8.2 × 10 <sup>8</sup><br>\$1.4 × 10 <sup>8</sup>              | 2.0 × 10 <sup>9</sup><br>\$3.4 × 10 <sup>8</sup>              | 0<br>\$0                                                      | 9.7 × 10 <sup>8</sup><br>\$1.6 × 10 <sup>8</sup>              | 0<br>\$0                                                     | 6.9 × 10 <sup>9</sup><br>\$1.2 × 10 <sup>9</sup>               |
| Prince George's | 9.1 × 10 <sup>9</sup><br>\$1.5 × 10 <sup>9</sup>                  | 1.5 × 10 <sup>9</sup><br>\$2.6 × 10 <sup>8</sup>              | 1.6 × 10 <sup>9</sup><br>\$2.7 × 10 <sup>8</sup>              | 2.8 × 10 <sup>3</sup><br>\$4.7 × 10 <sup>2</sup>              | 5.3 × 10 <sup>7</sup><br>\$9.0 × 10 <sup>6</sup>              | 0<br>\$0                                                     | 5.9 × 10 <sup>9</sup><br>\$9.9 × 10 <sup>8</sup>               |
| Queen Anne's    | 8.5 × 10 <sup>9</sup><br>\$1.4 × 10 <sup>9</sup>                  | 6.3 × 10 <sup>8</sup><br>\$1.1 × 10 <sup>8</sup>              | 1.1 × 10 <sup>9</sup><br>\$1.8 × 10 <sup>8</sup>              | 1.0 × 10 <sup>9</sup><br>\$1.7 × 10 <sup>8</sup>              | 7.9 × 10 <sup>7</sup><br>\$1.3 × 10 <sup>7</sup>              | 0<br>\$0                                                     | 5.7 × 10 <sup>9</sup><br>\$9.7 × 10 <sup>8</sup>               |
| Somerset        | 7.6 × 10 <sup>9</sup><br>\$1.3 × 10 <sup>9</sup>                  | 6.3 × 10 <sup>8</sup><br>\$1.1 × 10 <sup>8</sup>              | 1.8 × 10 <sup>7</sup><br>\$3.1 × 10 <sup>6</sup>              | 1.3 × 10 <sup>9</sup><br>\$2.2 × 10 <sup>8</sup>              | 1.9 × 10 <sup>9</sup><br>\$3.1 × 10 <sup>8</sup>              | 3.2 × 10 <sup>8</sup><br>\$5.3 × 10 <sup>7</sup>             | 3.5 × 10 <sup>9</sup><br>\$5.9 × 10 <sup>8</sup>               |
| St. Mary's      | 5.9 × 10 <sup>9</sup><br>\$1.0 × 10 <sup>9</sup>                  | 5.6 × 10 <sup>8</sup><br>\$9.5 × 10 <sup>7</sup>              | 7.7 × 10 <sup>8</sup><br>\$1.3 × 10 <sup>8</sup>              | 0<br>\$0                                                      | 0<br>\$0                                                      | 0<br>\$0                                                     | 4.6 × 10 <sup>9</sup><br>\$7.8 × 10 <sup>8</sup>               |
| Talbot          | 4.5 × 10 <sup>9</sup><br>\$7.5 × 10 <sup>8</sup>                  | 4.5 × 10 <sup>7</sup><br>\$7.6 × 10 <sup>6</sup>              | 2.6 × 10 <sup>5</sup><br>\$4.4 × 10 <sup>4</sup>              | 9.3 × 10 <sup>8</sup><br>\$1.6 × 10 <sup>8</sup>              | 1.4 × 10 <sup>8</sup><br>\$2.3 × 10 <sup>7</sup>              | 0<br>\$0                                                     | 3.4 × 10 <sup>9</sup><br>\$5.7 × 10 <sup>8</sup>               |
| Washington      | 1.2 × 10 <sup>10</sup><br>\$2.1 × 10 <sup>9</sup>                 | 2.2 × 10 <sup>8</sup><br>\$3.8 × 10 <sup>7</sup>              | 2.5 × 10 <sup>9</sup><br>\$4.2 × 10 <sup>8</sup>              | 0<br>\$0                                                      | 7.6 × 10 <sup>9</sup><br>\$1.3 × 10 <sup>9</sup>              | 1.9 × 10 <sup>6</sup><br>\$3.3 × 10 <sup>5</sup>             | 2.0 × 10 <sup>9</sup><br>\$3.3 × 10 <sup>8</sup>               |
| Wicomico        | 9.5 × 10 <sup>9</sup><br>\$1.6 × 10 <sup>9</sup>                  | 1.8 × 10 <sup>9</sup><br>\$3.1 × 10 <sup>8</sup>              | 2.5 × 10 <sup>9</sup><br>\$4.1 × 10 <sup>8</sup>              | 1.3 × 10 <sup>9</sup><br>\$2.3 × 10 <sup>8</sup>              | 5.1 × 10 <sup>8</sup><br>\$8.6 × 10 <sup>7</sup>              | 3.7 × 10 <sup>8</sup><br>\$6.2 × 10 <sup>7</sup>             | 3.0 × 10 <sup>9</sup><br>\$5.1 × 10 <sup>8</sup>               |
| Worcester       | 1.8 × 10 <sup>10</sup><br>\$3.1 × 10 <sup>9</sup>                 | 2.9 × 10 <sup>9</sup><br>\$5.0 × 10 <sup>8</sup>              | 2.9 × 10 <sup>6</sup><br>\$4.9 × 10 <sup>5</sup>              | 8.1 × 10 <sup>9</sup><br>\$1.4 × 10 <sup>9</sup>              | 0<br>\$0                                                      | 1.7 × 10 <sup>9</sup><br>\$2.9 × 10 <sup>8</sup>             | 5.4 × 10 <sup>9</sup><br>\$9.1 × 10 <sup>8</sup>               |
| <b>Totals</b>   | <b>4.9 × 10<sup>11</sup></b><br><b>\$4.1 × 10<sup>10</sup></b>    | <b>2.0 × 10<sup>10</sup></b><br><b>\$3.3 × 10<sup>9</sup></b> | <b>4.7 × 10<sup>10</sup></b><br><b>\$7.9 × 10<sup>9</sup></b> | <b>4.0 × 10<sup>10</sup></b><br><b>\$6.7 × 10<sup>9</sup></b> | <b>3.3 × 10<sup>10</sup></b><br><b>\$5.6 × 10<sup>9</sup></b> | <b>3.1 × 10<sup>9</sup></b><br><b>\$5.3 × 10<sup>8</sup></b> | <b>1.0 × 10<sup>11</sup></b><br><b>\$1.7 × 10<sup>10</sup></b> |

Note: Entisols, Inceptisols, Alfisols, Spodosols, and Ultisols are mineral soils. Histosols are mostly organic soils. M = million = 10<sup>6</sup>; B = billion = 10<sup>9</sup>.
