# Supplementary material for: Net-Zero Target and Emissions from Land Conversions: A Case Study of Maryland’s Climate Solutions Now Act
Source: MDPI journal article supplement (doi:10.3390/geographies3010003), 2022-12-29
Supplement: s1 [file s1]

**Table S1.** Midpoint soil organic carbon (SOC) storage and its monetary value by soil order and county for the state of Maryland (USA), based on the areas shown in Table 3 and the area-normalized midpoint monetary values in Table 4.

| County/City     | Total<br>SOC Storage<br>(kg),<br>SC-CO <sub>2</sub><br>(\$ = USD) | Degree of Weathering and Soil Development                |                         |                         |                         |                         |                          |
|-----------------|-------------------------------------------------------------------|----------------------------------------------------------|-------------------------|-------------------------|-------------------------|-------------------------|--------------------------|
|                 |                                                                   | Slight                                                   |                         |                         | Moderate                | Strong                  |                          |
|                 |                                                                   | Entisols                                                 | Inceptisols             | Histosols               | Alfisols                | Spodosols               | Ultisols                 |
|                 |                                                                   | Total SOC Storage (kg),<br>SC-CO <sub>2</sub> (\$ = USD) |                         |                         |                         |                         |                          |
| Allegany        | 8.4 × 10 <sup>9</sup>                                             | 4.1 × 10 <sup>8</sup>                                    | 4.9 × 10 <sup>9</sup>   | 0                       | 7.2 × 10 <sup>8</sup>   | 1.3 × 10 <sup>2</sup>   | 2.3 × 10 <sup>9</sup>    |
|                 | \$1.4 × 10 <sup>9</sup>                                           | \$7.0 × 10 <sup>7</sup>                                  | \$8.3 × 10 <sup>8</sup> | \$0                     | \$1.2 × 10 <sup>8</sup> | \$2.6 × 10 <sup>3</sup> | \$4.0 × 10 <sup>8</sup>  |
| Anne Arundel    | 7.4 × 10 <sup>9</sup>                                             | 3.2 × 10 <sup>8</sup>                                    | 8.2 × 10 <sup>8</sup>   | 9.6 × 10 <sup>8</sup>   | 3.0 × 10 <sup>8</sup>   | 0                       | 5.0 × 10 <sup>9</sup>    |
|                 | \$1.3 × 10 <sup>9</sup>                                           | \$5.3 × 10 <sup>7</sup>                                  | \$1.4 × 10 <sup>8</sup> | \$1.6 × 10 <sup>8</sup> | \$5.1 × 10 <sup>7</sup> | \$0                     | \$8.5 × 10 <sup>8</sup>  |
| Baltimore City  | 8.4 × 10 <sup>8</sup>                                             | 2.1 × 10 <sup>8</sup>                                    | 6.2 × 10 <sup>7</sup>   | 1.2 × 10 <sup>5</sup>   | 2.2 × 10 <sup>8</sup>   | 0                       | 3.5 × 10 <sup>8</sup>    |
|                 | \$1.4 × 10 <sup>8</sup>                                           | \$3.5 × 10 <sup>7</sup>                                  | \$1.0 × 10 <sup>7</sup> | \$2.0 × 10 <sup>4</sup> | \$3.7 × 10 <sup>7</sup> | \$0                     | \$6.0 × 10 <sup>7</sup>  |
| Baltimore       | 1.1 × 10 <sup>10</sup>                                            | 1.5 × 10 <sup>9</sup>                                    | 1.5 × 10 <sup>9</sup>   | 9.7 × 10 <sup>8</sup>   | 1.0 × 10 <sup>9</sup>   | 0                       | 5.8 × 10 <sup>9</sup>    |
|                 | \$1.8 × 10 <sup>9</sup>                                           | \$2.5 × 10 <sup>8</sup>                                  | \$2.5 × 10 <sup>8</sup> | \$1.6 × 10 <sup>8</sup> | \$1.7 × 10 <sup>8</sup> | \$0                     | \$9.8 × 10 <sup>8</sup>  |
| Calvert         | 5.8 × 10 <sup>9</sup>                                             | 3.4 × 10 <sup>8</sup>                                    | 2.1 × 10 <sup>9</sup>   | 1.6 × 10 <sup>9</sup>   | 4.1 × 10 <sup>7</sup>   | 0                       | 1.8 × 10 <sup>9</sup>    |
|                 | \$9.8 × 10 <sup>8</sup>                                           | \$5.8 × 10 <sup>7</sup>                                  | \$3.5 × 10 <sup>8</sup> | \$2.6 × 10 <sup>8</sup> | \$6.9 × 10 <sup>6</sup> | \$0                     | \$3.0 × 10 <sup>8</sup>  |
| Caroline        | 5.0 × 10 <sup>9</sup>                                             | 4.1 × 10 <sup>8</sup>                                    | 1.9 × 10 <sup>8</sup>   | 4.5 × 10 <sup>8</sup>   | 2.3 × 10 <sup>7</sup>   | 0                       | 3.9 × 10 <sup>9</sup>    |
|                 | \$8.5 × 10 <sup>8</sup>                                           | \$6.9 × 10 <sup>7</sup>                                  | \$3.1 × 10 <sup>7</sup> | \$7.6 × 10 <sup>7</sup> | \$3.9 × 10 <sup>6</sup> | \$0                     | \$6.7 × 10 <sup>8</sup>  |
| Carroll         | 8.2 × 10 <sup>9</sup>                                             | 2.7 × 10 <sup>8</sup>                                    | 1.0 × 10 <sup>9</sup>   | 0                       | 1.3 × 10 <sup>9</sup>   | 0                       | 5.6 × 10 <sup>9</sup>    |
|                 | \$1.4 × 10 <sup>9</sup>                                           | \$4.5 × 10 <sup>7</sup>                                  | \$1.7 × 10 <sup>8</sup> | \$0                     | \$2.2 × 10 <sup>8</sup> | \$0                     | \$9.5 × 10 <sup>8</sup>  |
| Cecil           | 5.2 × 10 <sup>9</sup>                                             | 3.7 × 10 <sup>8</sup>                                    | 2.5 × 10 <sup>8</sup>   | 0                       | 3.7 × 10 <sup>8</sup>   | 0                       | 4.2 × 10 <sup>9</sup>    |
|                 | \$8.7 × 10 <sup>8</sup>                                           | \$6.2 × 10 <sup>7</sup>                                  | \$4.3 × 10 <sup>7</sup> | \$0                     | \$6.3 × 10 <sup>7</sup> | \$0                     | \$7.1 × 10 <sup>8</sup>  |
| Charles         | 8.7 × 10 <sup>9</sup>                                             | 7.1 × 10 <sup>8</sup>                                    | 1.1 × 10 <sup>9</sup>   | 0                       | 2.9 × 10 <sup>8</sup>   | 0                       | 6.6 × 10 <sup>9</sup>    |
|                 | \$1.5 × 10 <sup>9</sup>                                           | \$1.2 × 10 <sup>8</sup>                                  | \$1.9 × 10 <sup>8</sup> | \$0                     | \$4.9 × 10 <sup>7</sup> | \$0                     | \$1.1 × 10 <sup>9</sup>  |
| Dorchester      | 2.8 × 10 <sup>10</sup>                                            | 9.6 × 10 <sup>8</sup>                                    | 4.6 × 10 <sup>8</sup>   | 1.9 × 10 <sup>10</sup>  | 1.7 × 10 <sup>9</sup>   | 0                       | 5.9 × 10 <sup>9</sup>    |
|                 | \$4.7 × 10 <sup>9</sup>                                           | \$1.6 × 10 <sup>8</sup>                                  | \$7.8 × 10 <sup>7</sup> | \$3.1 × 10 <sup>9</sup> | \$2.9 × 10 <sup>8</sup> | \$0                     | \$1.0 × 10 <sup>9</sup>  |
| Frederick       | 1.2 × 10 <sup>10</sup>                                            | 1.3 × 10 <sup>8</sup>                                    | 2.4 × 10 <sup>9</sup>   | 0                       | 6.3 × 10 <sup>9</sup>   | 3.9                     | 3.5 × 10 <sup>9</sup>    |
|                 | \$2.1 × 10 <sup>9</sup>                                           | \$2.2 × 10 <sup>7</sup>                                  | \$4.1 × 10 <sup>8</sup> | \$0                     | \$1.1 × 10 <sup>9</sup> | \$8.1 × 10 <sup>6</sup> | \$5.9 × 10 <sup>8</sup>  |
| Garrett         | 1.3 × 10 <sup>10</sup>                                            | 3.0 × 10 <sup>8</sup>                                    | 4.9 × 10 <sup>9</sup>   | 0                       | 7.0 × 10 <sup>8</sup>   | 53.0                    | 6.6 × 10 <sup>9</sup>    |
|                 | \$2.2 × 10 <sup>9</sup>                                           | \$5.0 × 10 <sup>7</sup>                                  | \$8.3 × 10 <sup>8</sup> | \$0                     | \$1.2 × 10 <sup>8</sup> | \$1.1 × 10 <sup>8</sup> | \$1.1 × 10 <sup>9</sup>  |
| Harford         | 1.0 × 10 <sup>10</sup>                                            | 3.6 × 10 <sup>7</sup>                                    | 2.4 × 10 <sup>9</sup>   | 2.9 × 10 <sup>9</sup>   | 9.9 × 10 <sup>8</sup>   | 0                       | 3.6 × 10 <sup>9</sup>    |
|                 | \$1.7 × 10 <sup>9</sup>                                           | \$6.1 × 10 <sup>6</sup>                                  | \$4.1 × 10 <sup>8</sup> | \$4.9 × 10 <sup>8</sup> | \$1.7 × 10 <sup>8</sup> | \$0                     | \$6.2 × 10 <sup>8</sup>  |
| Howard          | 4.3 × 10 <sup>9</sup>                                             | 2.7 × 10 <sup>8</sup>                                    | 1.1 × 10 <sup>9</sup>   | 0                       | 1.3 × 10 <sup>8</sup>   | 0                       | 2.8 × 10 <sup>9</sup>    |
|                 | \$7.2 × 10 <sup>8</sup>                                           | \$4.5 × 10 <sup>7</sup>                                  | \$1.8 × 10 <sup>8</sup> | \$0                     | \$2.1 × 10 <sup>7</sup> | \$0                     | \$4.7 × 10 <sup>8</sup>  |
| Kent            | 5.8 × 10 <sup>9</sup>                                             | 2.9 × 10 <sup>8</sup>                                    | 1.4 × 10 <sup>6</sup>   | 1.2 × 10 <sup>9</sup>   | 0                       | 0                       | 4.3 × 10 <sup>9</sup>    |
|                 | \$9.8 × 10 <sup>8</sup>                                           | \$4.8 × 10 <sup>7</sup>                                  | \$2.4 × 10 <sup>5</sup> | \$2.0 × 10 <sup>8</sup> | \$0                     | \$0                     | \$7.3 × 10 <sup>8</sup>  |
| Montgomery      | 9.3 × 10 <sup>9</sup>                                             | 5.1 × 10 <sup>8</sup>                                    | 1.3 × 10 <sup>9</sup>   | 0                       | 6.2 × 10 <sup>8</sup>   | 0                       | 6.9 × 10 <sup>9</sup>    |
|                 | \$1.6 × 10 <sup>9</sup>                                           | \$8.6 × 10 <sup>7</sup>                                  | \$2.2 × 10 <sup>8</sup> | \$0                     | \$1.0 × 10 <sup>8</sup> | \$0                     | \$1.2 × 10 <sup>9</sup>  |
| Prince George's | 7.9 × 10 <sup>9</sup>                                             | 9.5 × 10 <sup>8</sup>                                    | 1.0 × 10 <sup>9</sup>   | 2.8 × 10 <sup>3</sup>   | 3.4 × 10 <sup>7</sup>   | 0                       | 5.9 × 10 <sup>9</sup>    |
|                 | \$1.3 × 10 <sup>9</sup>                                           | \$1.6 × 10 <sup>8</sup>                                  | \$1.7 × 10 <sup>8</sup> | \$4.7 × 10 <sup>2</sup> | \$5.7 × 10 <sup>6</sup> | \$0                     | \$9.9 × 10 <sup>8</sup>  |
| Queen Anne's    | 7.9 × 10 <sup>9</sup>                                             | 3.9 × 10 <sup>8</sup>                                    | 6.7 × 10 <sup>8</sup>   | 1.0 × 10 <sup>9</sup>   | 5.0 × 10 <sup>7</sup>   | 0                       | 5.7 × 10 <sup>9</sup>    |
|                 | \$1.3 × 10 <sup>9</sup>                                           | \$6.6 × 10 <sup>7</sup>                                  | \$1.1 × 10 <sup>8</sup> | \$1.7 × 10 <sup>8</sup> | \$8.5 × 10 <sup>6</sup> | \$0                     | \$9.7 × 10 <sup>8</sup>  |
| Somerset        | 6.6 × 10 <sup>9</sup>                                             | 3.9 × 10 <sup>8</sup>                                    | 1.2 × 10 <sup>7</sup>   | 1.3 × 10 <sup>9</sup>   | 1.2 × 10 <sup>9</sup>   | 24.4                    | 3.5 × 10 <sup>9</sup>    |
|                 | \$1.1 × 10 <sup>9</sup>                                           | \$6.7 × 10 <sup>7</sup>                                  | \$2.0 × 10 <sup>6</sup> | \$2.1 × 10 <sup>8</sup> | \$2.0 × 10 <sup>8</sup> | \$5.1 × 10 <sup>7</sup> | \$5.9 × 10 <sup>8</sup>  |
| St. Mary's      | 5.4 × 10 <sup>9</sup>                                             | 3.5 × 10 <sup>8</sup>                                    | 4.9 × 10 <sup>8</sup>   | 0                       | 0                       | 0                       | 4.6 × 10 <sup>9</sup>    |
|                 | \$9.2 × 10 <sup>8</sup>                                           | \$5.9 × 10 <sup>7</sup>                                  | \$8.2 × 10 <sup>7</sup> | \$0                     | \$0                     | \$0                     | \$7.8 × 10 <sup>8</sup>  |
| Talbot          | 4.4 × 10 <sup>9</sup>                                             | 2.8 × 10 <sup>7</sup>                                    | 1.7 × 10 <sup>5</sup>   | 9.1 × 10 <sup>8</sup>   | 8.6 × 10 <sup>7</sup>   | 0                       | 3.4 × 10 <sup>9</sup>    |
|                 | \$7.4 × 10 <sup>8</sup>                                           | \$4.7 × 10 <sup>6</sup>                                  | \$2.8 × 10 <sup>4</sup> | \$1.5 × 10 <sup>8</sup> | \$1.5 × 10 <sup>7</sup> | \$0                     | \$5.7 × 10 <sup>8</sup>  |
| Washington      | 8.5 × 10 <sup>9</sup>                                             | 1.4 × 10 <sup>8</sup>                                    | 1.6 × 10 <sup>9</sup>   | 0                       | 4.8 × 10 <sup>9</sup>   | 0.15                    | 2.0 × 10 <sup>9</sup>    |
|                 | \$1.4 × 10 <sup>9</sup>                                           | \$2.4 × 10 <sup>7</sup>                                  | \$2.7 × 10 <sup>8</sup> | \$0                     | \$8.2 × 10 <sup>8</sup> | \$3.1 × 10 <sup>5</sup> | \$3.3 × 10 <sup>8</sup>  |
| Wicomico        | 7.7 × 10 <sup>9</sup>                                             | 1.1 × 10 <sup>9</sup>                                    | 1.6 × 10 <sup>9</sup>   | 1.3 × 10 <sup>9</sup>   | 3.2 × 10 <sup>8</sup>   | 28.5                    | 3.0 × 10 <sup>9</sup>    |
|                 | \$1.3 × 10 <sup>9</sup>                                           | \$1.9 × 10 <sup>8</sup>                                  | \$2.6 × 10 <sup>8</sup> | \$2.2 × 10 <sup>8</sup> | \$5.5 × 10 <sup>7</sup> | \$5.9 × 10 <sup>7</sup> | \$5.1 × 10 <sup>8</sup>  |
| Worcester       | 1.7 × 10 <sup>10</sup>                                            | 1.8 × 10 <sup>9</sup>                                    | 1.9 × 10 <sup>6</sup>   | 8.0 × 10 <sup>9</sup>   | 0                       | 1.3 × 10 <sup>2</sup>   | 5.4 × 10 <sup>9</sup>    |
|                 | \$2.8 × 10 <sup>9</sup>                                           | \$3.1 × 10 <sup>8</sup>                                  | \$3.1 × 10 <sup>5</sup> | \$1.3 × 10 <sup>9</sup> | \$0                     | \$2.7 × 10 <sup>8</sup> | \$9.1 × 10 <sup>8</sup>  |
| <b>Totals</b>   | 2.1 × 10 <sup>11</sup>                                            | 1.2 × 10 <sup>10</sup>                                   | 3.0 × 10 <sup>10</sup>  | 3.9 × 10 <sup>10</sup>  | 2.1 × 10 <sup>10</sup>  | 3.0 × 10 <sup>9</sup>   | 1.0 × 10 <sup>11</sup>   |
|                 | \$3.5 × 10 <sup>10</sup>                                          | \$2.1 × 10 <sup>9</sup>                                  | \$5.0 × 10 <sup>9</sup> | \$6.6 × 10 <sup>9</sup> | \$3.6 × 10 <sup>9</sup> | \$5.0 × 10 <sup>8</sup> | \$1.7 × 10 <sup>10</sup> |

Note: Entisols, Inceptisols, Alfisols, Spodosols, and Ultisols are mineral soils. Histosols are mostly organic soils. M = million = 10<sup>6</sup>; B = billion = 10<sup>9</sup>.
