# Supplementary material for: Net-Zero Target and Emissions from Land Conversions: A Case Study of Maryland’s Climate Solutions Now Act
Source: MDPI journal article supplement (doi:10.3390/geographies3010003), 2022-12-29
Supplement: s1 [file s1]

**Table S2.** Midpoint soil organic carbon (SIC) storage and its monetary value by soil order and county for the state of Maryland (USA), based on the areas shown in Table 3 and the area-normalized midpoint monetary values in Table 4.

| County/City     | Total<br>SIC Storage<br>(kg),<br>SC-CO <sub>2</sub><br>(\$ = USD) | Degree of Weathering and Soil Development                |                                                         |                                                        |                                                         |                                                        |                 |
|-----------------|-------------------------------------------------------------------|----------------------------------------------------------|---------------------------------------------------------|--------------------------------------------------------|---------------------------------------------------------|--------------------------------------------------------|-----------------|
|                 |                                                                   | Slight                                                   |                                                         |                                                        | Moderate                                                | Strong                                                 |                 |
|                 |                                                                   | Entisols                                                 | Inceptisols                                             | Histosols                                              | Alfisols                                                | Spodosols                                              | Ultisols        |
|                 |                                                                   | Total SIC Storage (kg),<br>SC-CO <sub>2</sub> (\$ = USD) |                                                         |                                                        |                                                         |                                                        |                 |
| Allegany        | 3.5 × 10 <sup>9</sup><br>\$5.9 × 10 <sup>8</sup>                  | 2.5 × 10 <sup>8</sup><br>\$4.2 × 10 <sup>7</sup>         | 2.8 × 10 <sup>9</sup><br>\$4.7 × 10 <sup>8</sup>        | 0<br>\$0                                               | 4.1 × 10 <sup>8</sup><br>\$6.9 × 10 <sup>7</sup>        | 7.6 × 10 <sup>2</sup><br>\$1.3 × 10 <sup>2</sup>       | 0<br>\$0        |
| Anne Arundel    | 8.5 × 10 <sup>8</sup><br>\$1.4 × 10 <sup>8</sup>                  | 1.9 × 10 <sup>8</sup><br>\$3.2 × 10 <sup>7</sup>         | 4.7 × 10 <sup>8</sup><br>\$7.9 × 10 <sup>7</sup>        | 1.6 × 10 <sup>7</sup><br>\$2.8 × 10 <sup>6</sup>       | 1.7 × 10 <sup>8</sup><br>\$2.9 × 10 <sup>7</sup>        | 0<br>\$0                                               | 0<br>\$0        |
| Baltimore City  | 2.9 × 10 <sup>8</sup><br>\$4.8 × 10 <sup>7</sup>                  | 1.2 × 10 <sup>8</sup><br>\$2.1 × 10 <sup>7</sup>         | 3.5 × 10 <sup>7</sup><br>\$6.0 × 10 <sup>6</sup>        | 2.1 × 10 <sup>3</sup><br>\$3.5 × 10 <sup>2</sup>       | 1.3 × 10 <sup>8</sup><br>\$2.1 × 10 <sup>7</sup>        | 0<br>\$0                                               | 0<br>\$0        |
| Baltimore       | 2.3 × 10 <sup>9</sup><br>\$4.0 × 10 <sup>8</sup>                  | 8.8 × 10 <sup>8</sup><br>\$1.5 × 10 <sup>8</sup>         | 8.6 × 10 <sup>8</sup><br>\$1.4 × 10 <sup>8</sup>        | 1.7 × 10 <sup>7</sup><br>\$2.8 × 10 <sup>6</sup>       | 5.9 × 10 <sup>8</sup><br>\$9.8 × 10 <sup>7</sup>        | 0<br>\$0                                               | 0<br>\$0        |
| Calvert         | 1.5 × 10 <sup>9</sup><br>\$2.5 × 10 <sup>8</sup>                  | 2.1 × 10 <sup>8</sup><br>\$3.5 × 10 <sup>7</sup>         | 1.2 × 10 <sup>9</sup><br>\$2.0 × 10 <sup>8</sup>        | 2.7 × 10 <sup>7</sup><br>\$4.6 × 10 <sup>6</sup>       | 2.3 × 10 <sup>7</sup><br>\$3.9 × 10 <sup>6</sup>        | 0<br>\$0                                               | 0<br>\$0        |
| Caroline        | 3.7 × 10 <sup>8</sup><br>\$6.3 × 10 <sup>7</sup>                  | 2.4 × 10 <sup>8</sup><br>\$4.2 × 10 <sup>7</sup>         | 1.1 × 10 <sup>8</sup><br>\$1.8 × 10 <sup>7</sup>        | 7.7 × 10 <sup>6</sup><br>\$1.3 × 10 <sup>6</sup>       | 1.3 × 10 <sup>7</sup><br>\$2.2 × 10 <sup>6</sup>        | 0<br>\$0                                               | 0<br>\$0        |
| Carroll         | 1.5 × 10 <sup>9</sup><br>\$2.5 × 10 <sup>8</sup>                  | 1.6 × 10 <sup>8</sup><br>\$2.7 × 10 <sup>7</sup>         | 5.9 × 10 <sup>8</sup><br>\$9.9 × 10 <sup>7</sup>        | 0<br>\$0                                               | 7.4 × 10 <sup>8</sup><br>\$1.2 × 10 <sup>8</sup>        | 0<br>\$0                                               | 0<br>\$0        |
| Cecil           | 5.8 × 10 <sup>8</sup><br>\$9.8 × 10 <sup>7</sup>                  | 2.2 × 10 <sup>8</sup><br>\$3.8 × 10 <sup>7</sup>         | 1.4 × 10 <sup>8</sup><br>\$2.4 × 10 <sup>7</sup>        | 0<br>\$0                                               | 2.1 × 10 <sup>8</sup><br>\$3.6 × 10 <sup>7</sup>        | 0<br>\$0                                               | 0<br>\$0        |
| Charles         | 1.2 × 10 <sup>9</sup><br>\$2.1 × 10 <sup>8</sup>                  | 4.3 × 10 <sup>8</sup><br>\$7.3 × 10 <sup>7</sup>         | 6.3 × 10 <sup>8</sup><br>\$1.1 × 10 <sup>8</sup>        | 0<br>\$0                                               | 1.7 × 10 <sup>8</sup><br>\$2.8 × 10 <sup>7</sup>        | 0<br>\$0                                               | 0<br>\$0        |
| Dorchester      | 2.2 × 10 <sup>9</sup><br>\$3.6 × 10 <sup>8</sup>                  | 5.7 × 10 <sup>8</sup><br>\$9.8 × 10 <sup>7</sup>         | 2.7 × 10 <sup>8</sup><br>\$4.5 × 10 <sup>7</sup>        | 3.2 × 10 <sup>8</sup><br>\$5.4 × 10 <sup>7</sup>       | 1.0 × 10 <sup>9</sup><br>\$1.7 × 10 <sup>8</sup>        | 0<br>\$0                                               | 0<br>\$0        |
| Frederick       | 5.1 × 10 <sup>9</sup><br>\$8.5 × 10 <sup>8</sup>                  | 7.8 × 10 <sup>7</sup><br>\$1.3 × 10 <sup>7</sup>         | 1.4 × 10 <sup>9</sup><br>\$2.3 × 10 <sup>8</sup>        | 0<br>\$0                                               | 3.6 × 10 <sup>9</sup><br>\$6.0 × 10 <sup>8</sup>        | 2.4 × 10 <sup>6</sup><br>\$3.9 × 10 <sup>5</sup>       | 0<br>\$0        |
| Garrett         | 3.4 × 10 <sup>9</sup><br>\$5.8 × 10 <sup>8</sup>                  | 1.8 × 10 <sup>8</sup><br>\$3.0 × 10 <sup>7</sup>         | 2.8 × 10 <sup>9</sup><br>\$4.7 × 10 <sup>8</sup>        | 0<br>\$0                                               | 4.0 × 10 <sup>8</sup><br>\$6.7 × 10 <sup>7</sup>        | 3.2 × 10 <sup>7</sup><br>\$5.3 × 10 <sup>6</sup>       | 0<br>\$0        |
| Harford         | 2.0 × 10 <sup>9</sup><br>\$3.4 × 10 <sup>8</sup>                  | 2.2 × 10 <sup>7</sup><br>\$3.7 × 10 <sup>6</sup>         | 1.4 × 10 <sup>9</sup><br>\$2.3 × 10 <sup>8</sup>        | 5.0 × 10 <sup>7</sup><br>\$8.5 × 10 <sup>6</sup>       | 5.7 × 10 <sup>8</sup><br>\$9.5 × 10 <sup>7</sup>        | 0<br>\$0                                               | 0<br>\$0        |
| Howard          | 8.6 × 10 <sup>8</sup><br>\$1.5 × 10 <sup>8</sup>                  | 1.6 × 10 <sup>8</sup><br>\$2.7 × 10 <sup>7</sup>         | 6.3 × 10 <sup>8</sup><br>\$1.1 × 10 <sup>8</sup>        | 0<br>\$0                                               | 7.2 × 10 <sup>7</sup><br>\$1.2 × 10 <sup>7</sup>        | 0<br>\$0                                               | 0<br>\$0        |
| Kent            | 1.9 × 10 <sup>8</sup><br>\$3.3 × 10 <sup>7</sup>                  | 1.7 × 10 <sup>8</sup><br>\$2.9 × 10 <sup>7</sup>         | 8.2 × 10 <sup>5</sup><br>\$1.4 × 10 <sup>5</sup>        | 2.0 × 10 <sup>7</sup><br>\$3.4 × 10 <sup>6</sup>       | 0<br>\$0                                                | 0<br>\$0                                               | 0<br>\$0        |
| Montgomery      | 1.4 × 10 <sup>9</sup><br>\$2.4 × 10 <sup>8</sup>                  | 3.1 × 10 <sup>8</sup><br>\$5.2 × 10 <sup>7</sup>         | 7.3 × 10 <sup>8</sup><br>\$1.2 × 10 <sup>8</sup>        | 0<br>\$0                                               | 3.5 × 10 <sup>8</sup><br>\$5.9 × 10 <sup>7</sup>        | 0<br>\$0                                               | 0<br>\$0        |
| Prince George's | 1.2 × 10 <sup>9</sup><br>\$2.0 × 10 <sup>8</sup>                  | 5.7 × 10 <sup>8</sup><br>\$9.7 × 10 <sup>7</sup>         | 5.9 × 10 <sup>8</sup><br>\$1.0 × 10 <sup>8</sup>        | 47.3<br>\$8.1                                          | 1.9 × 10 <sup>7</sup><br>\$3.3 × 10 <sup>6</sup>        | 0<br>\$0                                               | 0<br>\$0        |
| Queen Anne's    | 6.7 × 10 <sup>8</sup><br>\$1.1 × 10 <sup>8</sup>                  | 2.4 × 10 <sup>8</sup><br>\$4.0 × 10 <sup>7</sup>         | 3.8 × 10 <sup>8</sup><br>\$6.5 × 10 <sup>7</sup>        | 1.7 × 10 <sup>7</sup><br>\$2.9 × 10 <sup>6</sup>       | 2.9 × 10 <sup>7</sup><br>\$4.8 × 10 <sup>6</sup>        | 0<br>\$0                                               | 0<br>\$0        |
| Somerset        | 9.6 × 10 <sup>8</sup><br>\$1.6 × 10 <sup>8</sup>                  | 2.4 × 10 <sup>8</sup><br>\$4.0 × 10 <sup>7</sup>         | 6.7 × 10 <sup>6</sup><br>\$1.1 × 10 <sup>6</sup>        | 2.1 × 10 <sup>7</sup><br>\$3.7 × 10 <sup>6</sup>       | 6.8 × 10 <sup>8</sup><br>\$1.1 × 10 <sup>8</sup>        | 1.5 × 10 <sup>7</sup><br>\$2.4 × 10 <sup>6</sup>       | 0<br>\$0        |
| St. Mary's      | 4.9 × 10 <sup>8</sup><br>\$8.3 × 10 <sup>7</sup>                  | 2.1 × 10 <sup>8</sup><br>\$3.6 × 10 <sup>7</sup>         | 2.8 × 10 <sup>8</sup><br>\$4.7 × 10 <sup>7</sup>        | 0<br>\$0                                               | 0<br>\$0                                                | 0<br>\$0                                               | 0<br>\$0        |
| Talbot          | 8.2 × 10 <sup>7</sup><br>\$1.4 × 10 <sup>7</sup>                  | 1.7 × 10 <sup>7</sup><br>\$2.9 × 10 <sup>7</sup>         | 9.5 × 10 <sup>4</sup><br>\$1.6 × 10 <sup>4</sup>        | 1.6 × 10 <sup>7</sup><br>\$2.7 × 10 <sup>6</sup>       | 4.9 × 10 <sup>7</sup><br>\$8.3 × 10 <sup>6</sup>        | 0<br>\$0                                               | 0<br>\$0        |
| Washington      | 3.8 × 10 <sup>9</sup><br>\$6.3 × 10 <sup>8</sup>                  | 8.4 × 10 <sup>7</sup><br>\$1.4 × 10 <sup>7</sup>         | 9.1 × 10 <sup>8</sup><br>\$1.5 × 10 <sup>8</sup>        | 0<br>\$0                                               | 2.8 × 10 <sup>9</sup><br>\$4.6 × 10 <sup>8</sup>        | 9.0 × 10 <sup>4</sup><br>\$1.5 × 10 <sup>4</sup>       | 0<br>\$0        |
| Wicomico        | 1.8 × 10 <sup>9</sup><br>\$3.0 × 10 <sup>8</sup>                  | 6.8 × 10 <sup>8</sup><br>\$1.2 × 10 <sup>8</sup>         | 9.0 × 10 <sup>8</sup><br>\$1.5 × 10 <sup>8</sup>        | 2.3 × 10 <sup>7</sup><br>\$3.9 × 10 <sup>6</sup>       | 1.9 × 10 <sup>8</sup><br>\$3.1 × 10 <sup>7</sup>        | 1.7 × 10 <sup>7</sup><br>\$2.8 × 10 <sup>6</sup>       | 0<br>\$0        |
| Worcester       | 1.3 × 10 <sup>9</sup><br>\$2.3 × 10 <sup>8</sup>                  | 1.1 × 10 <sup>9</sup><br>\$1.9 × 10 <sup>8</sup>         | 1.1 × 10 <sup>6</sup><br>\$1.8 × 10 <sup>5</sup>        | 2.3 × 10 <sup>7</sup>                                  | 0<br>\$0                                                | 1.7 × 10 <sup>7</sup><br>\$1.3 × 10 <sup>7</sup>       | 0<br>\$0        |
| <b>Totals</b>   | 3.7 × 10 <sup>10</sup><br><b>\$6.3 × 10<sup>9</sup></b>           | 7.3 × 10 <sup>9</sup><br><b>\$1.2 × 10<sup>9</sup></b>   | 1.7 × 10 <sup>10</sup><br><b>\$2.9 × 10<sup>9</sup></b> | 1.4 × 10 <sup>8</sup><br><b>\$1.1 × 10<sup>8</sup></b> | 1.2 × 10 <sup>10</sup><br><b>\$2.0 × 10<sup>9</sup></b> | 1.5 × 10 <sup>8</sup><br><b>\$2.4 × 10<sup>7</sup></b> | 0<br><b>\$0</b> |

Note: Entisols, Inceptisols, Alfisols, Spodosols, and Ultisols are mineral soils. Histosols are mostly organic soils. M = million = 10<sup>6</sup>; B = billion = 10<sup>9</sup>.
